# Supplementary material
Source: HighWire-hosted journal article supplement (https://bmjopenrespres.bmj.com/content/6/1/e000402)

Supplementary Figure S1. Meta-regression corresponding to PAS gain and final AHI ("MMA + Gp" group).

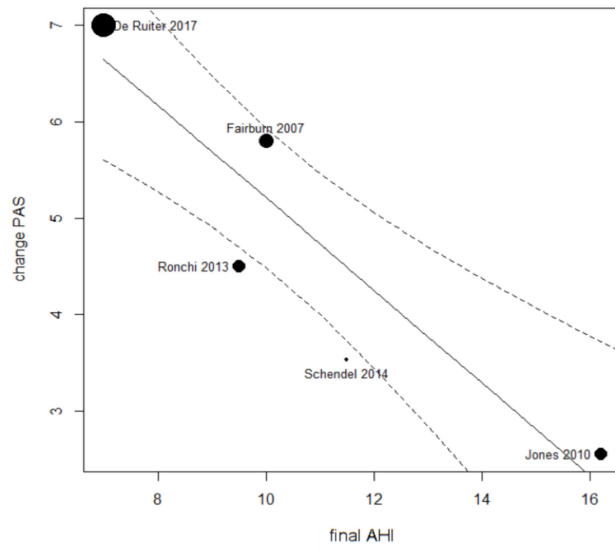

Supplement: inline-supplementary-material-1 [file inline-supplementary-material-1.pdf]
